# Supplementary material
Source: Springer Nature journal article supplement (https://www.springermedizin.de/resource/supplementary/12907_2012_118_MOESM9_ESM.pdf/9524704)

**A**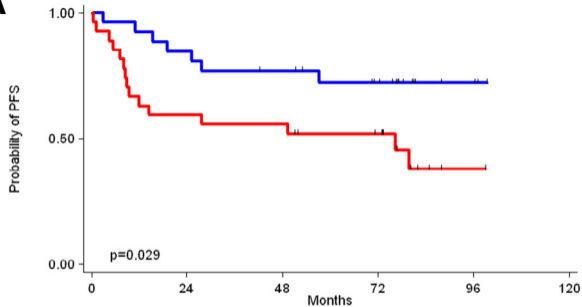

Patients at risk

|         |    |    |    |    |   |   |
|---------|----|----|----|----|---|---|
| Group A | 26 | 22 | 19 | 13 | 3 | 0 |
| Group B | 27 | 16 | 15 | 11 | 1 | 0 |

— Group A — Group B

**B**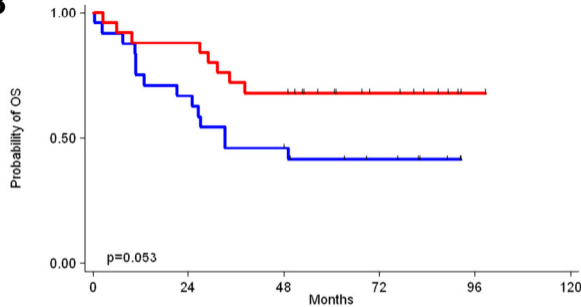

Patients at risk

|         |    |    |    |   |   |   |
|---------|----|----|----|---|---|---|
| Group A | 24 | 16 | 11 | 6 | 0 | 0 |
| Group B | 25 | 22 | 17 | 8 | 1 | 0 |

— Group A — Group B

Supplement: MOESM9 [file 9524704]
